# Supplementary figures and images for: Two Distinct N-Glycosylation Pathways Process the Haloferax volcanii S-Layer Glycoprotein upon Changes in Environmental Salinity
Source: PubMed Central journal article supplement — mBio. 2013 Nov 5;4(6):e00716-13. doi: 10.1128/mBio.00716-13 (PMC3892788; doi:10.1128/mbio.00716-13), 2013-11-05

*ΔaglI*

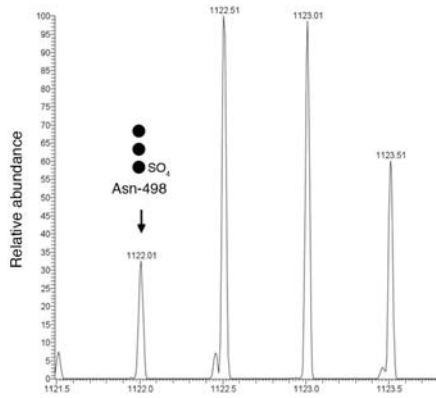

*ΔaglE*

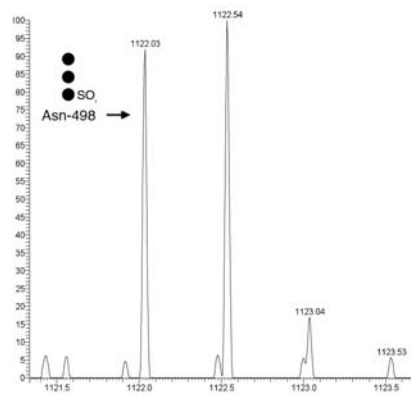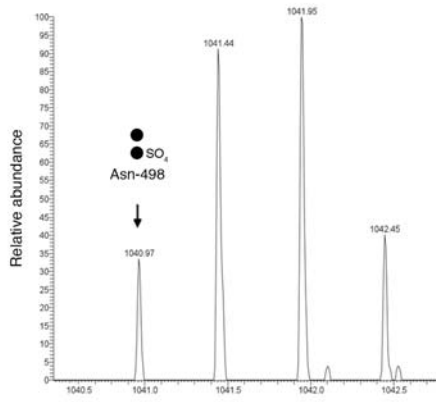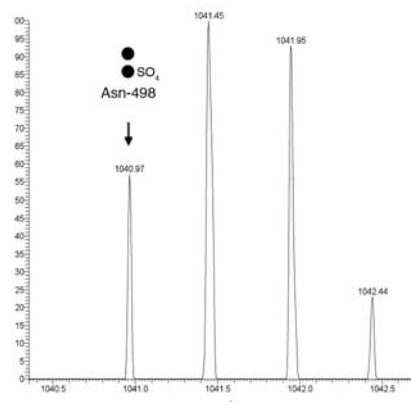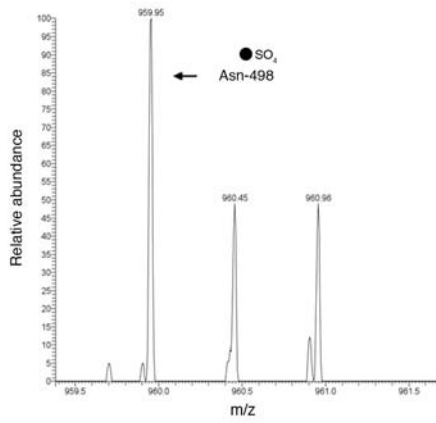

Supplement: mbo005131661sf01.pdf [file mbo005131661sf01.pdf]

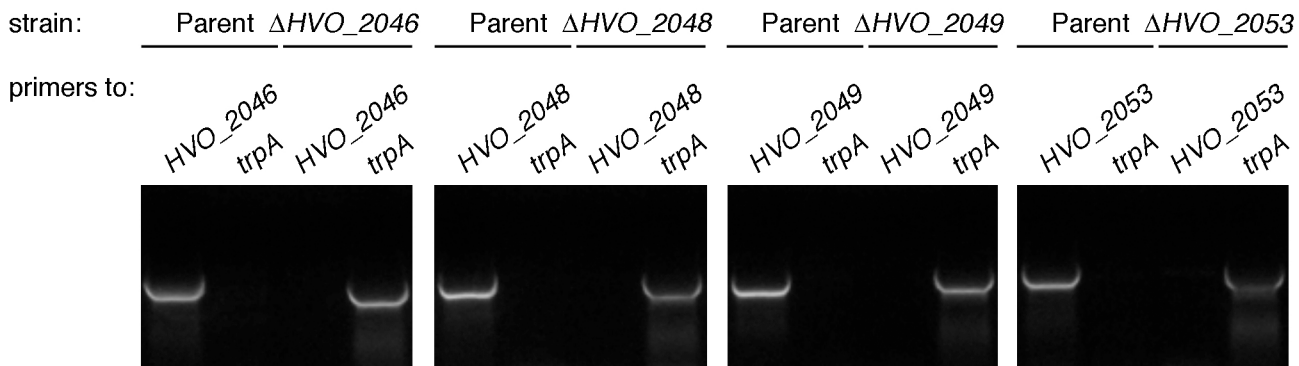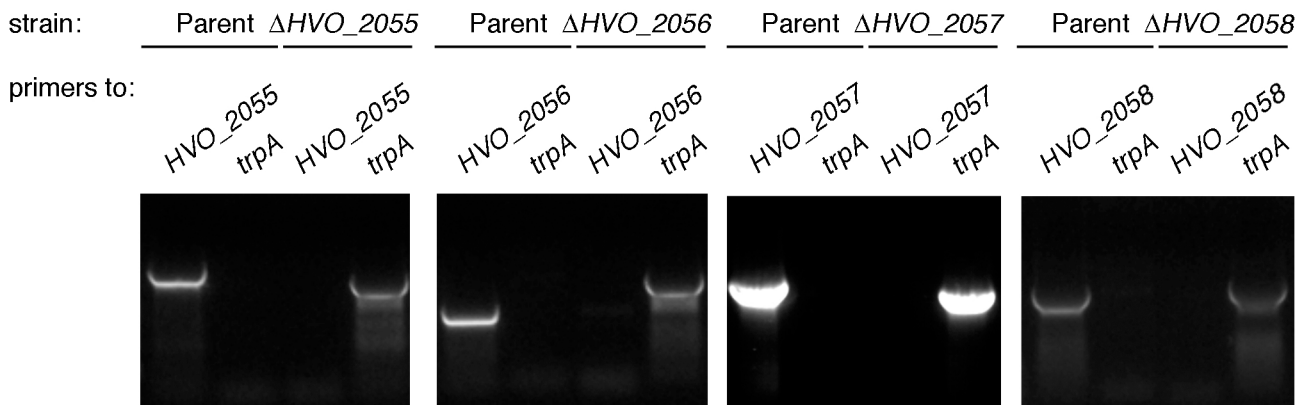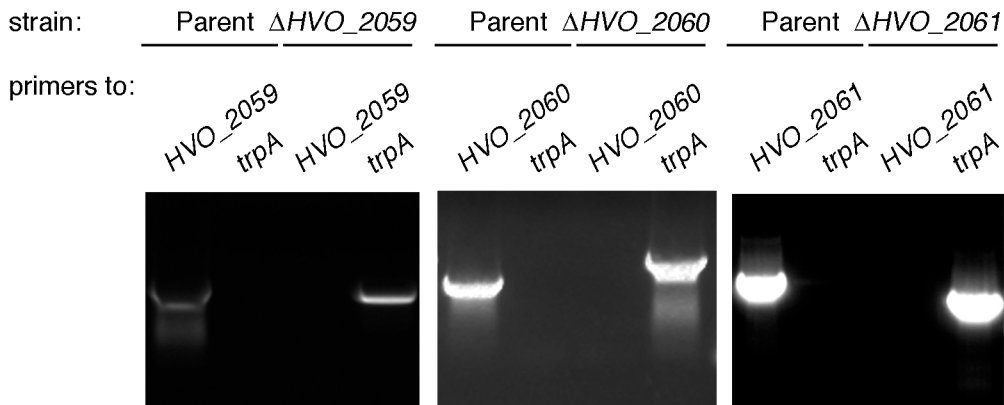

Supplement: mbo005131661sf02.pdf [file mbo005131661sf02.pdf]

A.

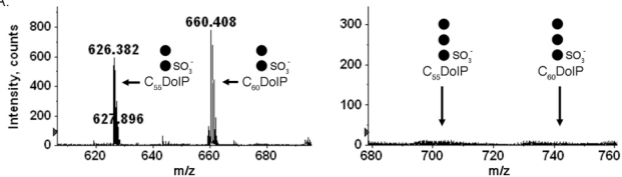

B.

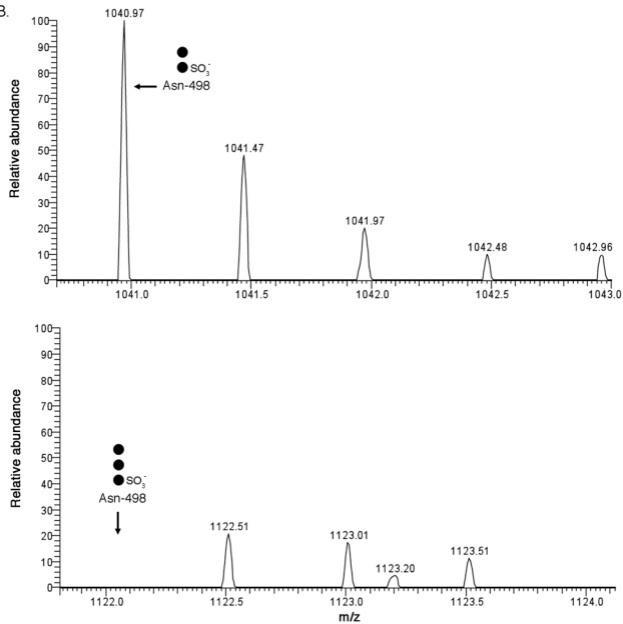

Supplement: mbo005131661sf03.pdf [file mbo005131661sf03.pdf]

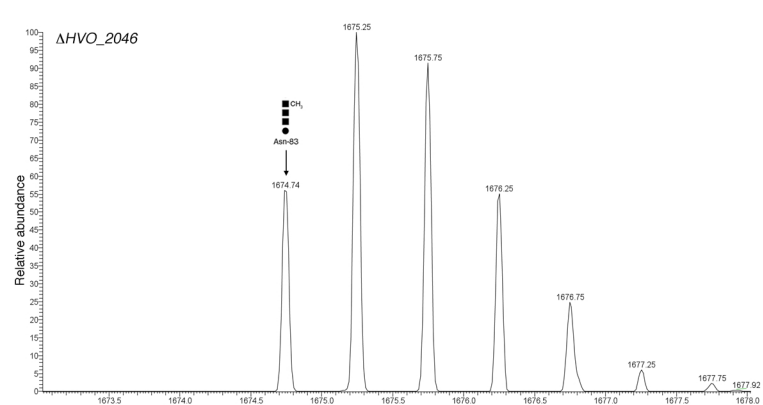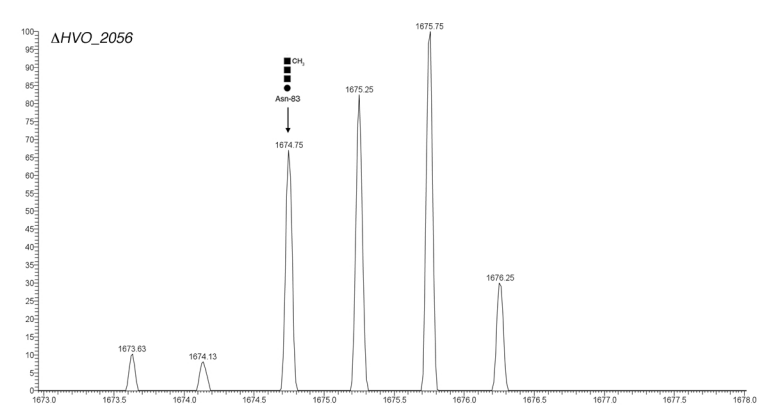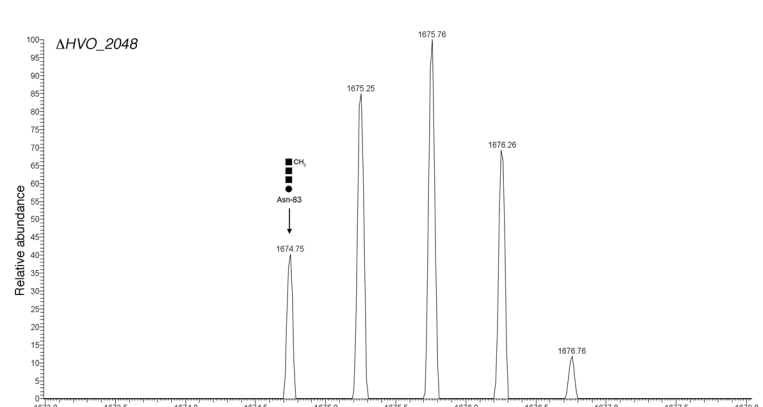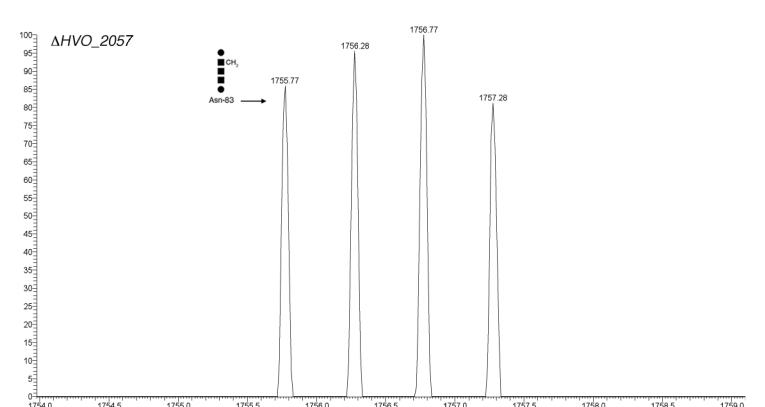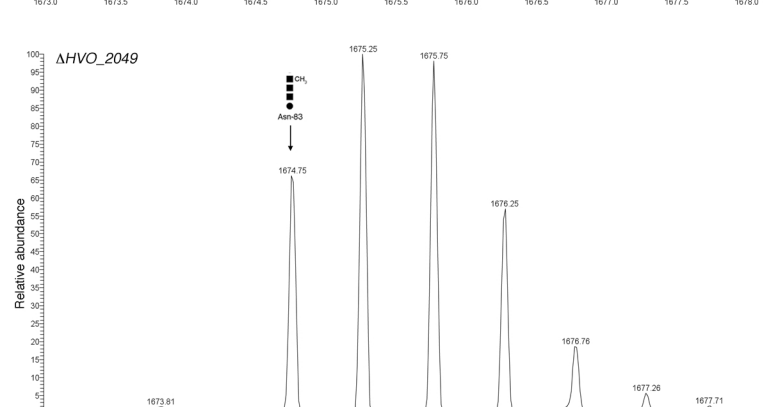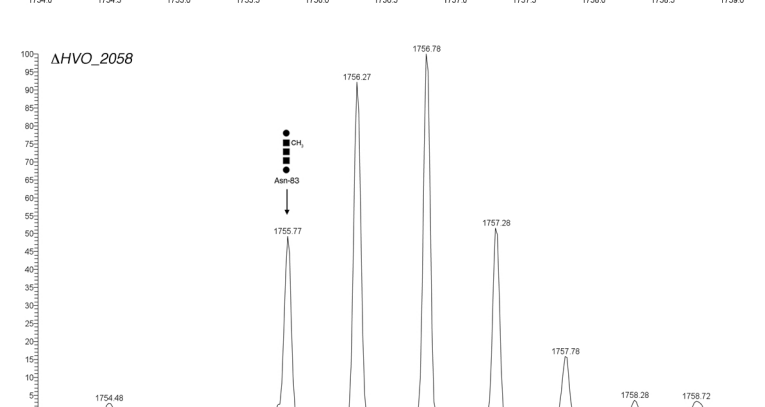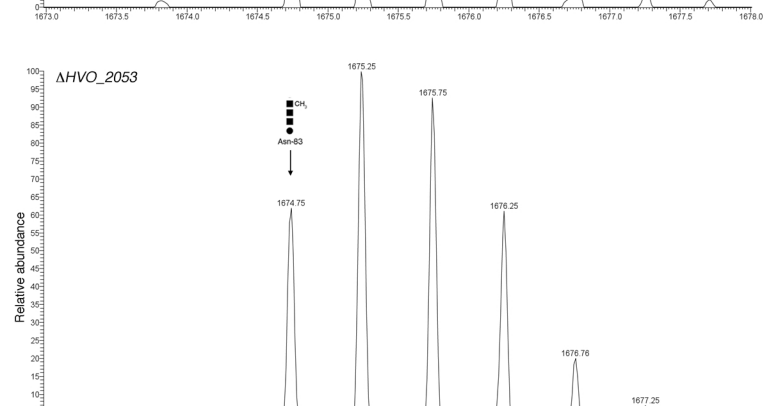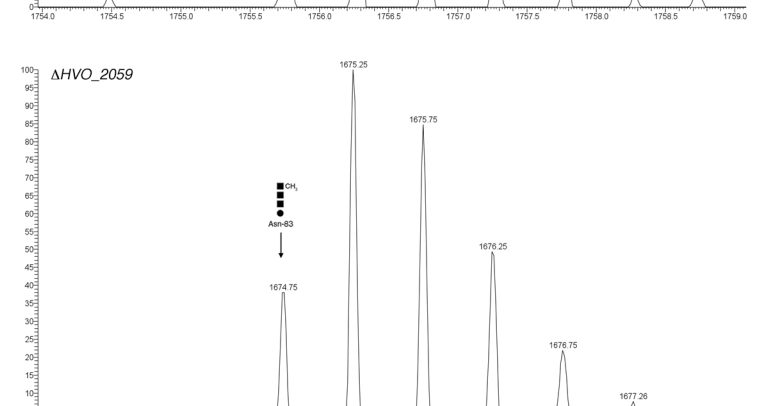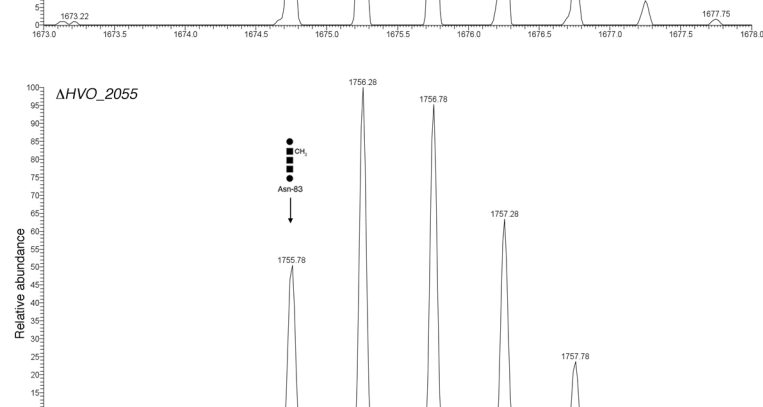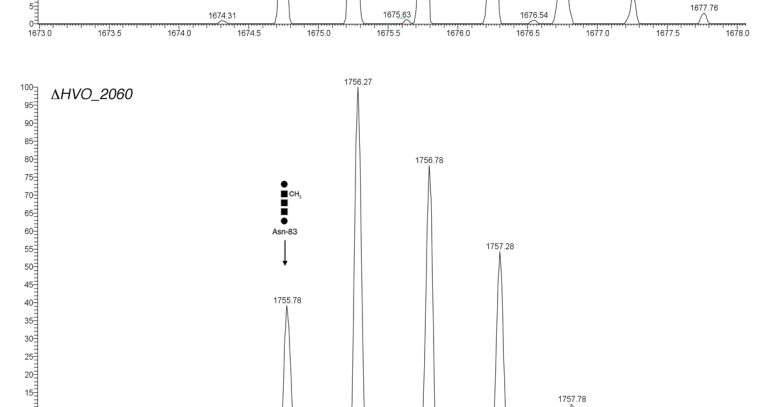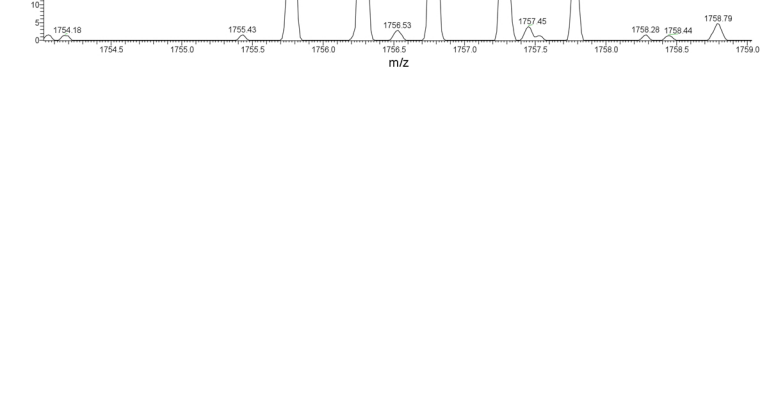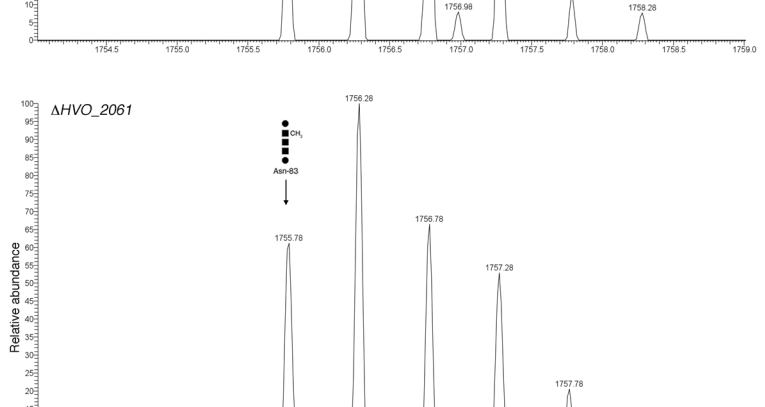

Supplement: mbo005131661sf04.pdf [file mbo005131661sf04.pdf]

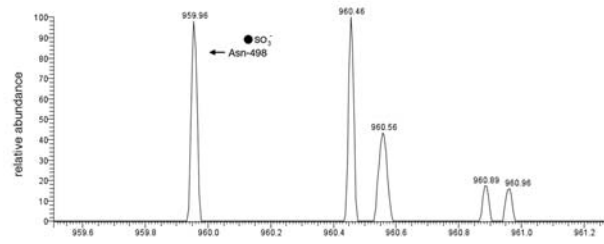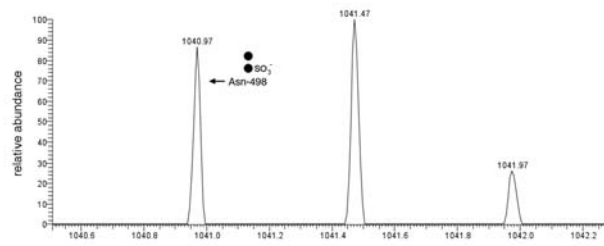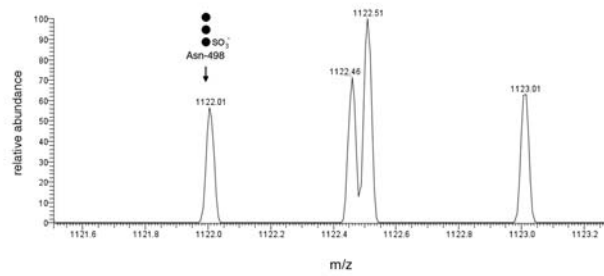

Supplement: mbo005131661sf05.pdf [file mbo005131661sf05.pdf]

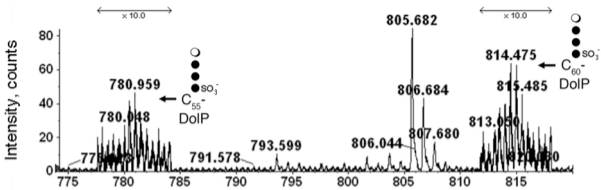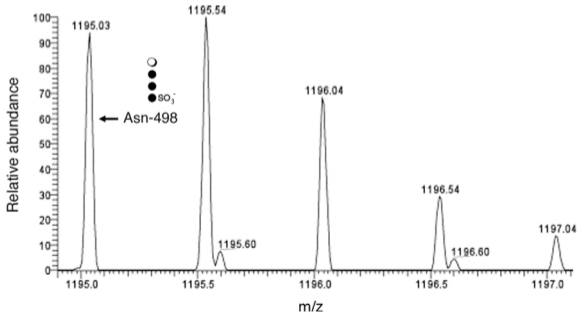

Supplement: mbo005131661sf06.pdf [file mbo005131661sf06.pdf]
